# Supplementary material
Source: PubMed Central journal article supplement (PMC7373013)
Supplement: mmc1.pdf [file mmc1.pdf]

# Nonuniform Impacts of COVID-19 Lockdown on Air Quality over the United States

## Supplemental Information

L.-W. Antony Chen<sup>1,3\*</sup>, Lung-Chang Chien<sup>2</sup>, Yi Li<sup>4</sup>, and Ge Lin<sup>2</sup>

<sup>1</sup>*Department of Environmental and Occupational Health, School of Public Health, University of Nevada, Las Vegas, NV, 89154, USA*

<sup>2</sup>*Department of Epidemiology and Biostatistics, School of Public Health, University of Nevada, Las Vegas, NV, 89154, USA*

<sup>3</sup>*Division of Atmospheric Sciences, Desert Research Institute, Reno, Nevada, 89512, USA*

<sup>4</sup>*SailBri Cooper Inc., Tigard, Oregon, 97223, USA*

\*Corresponding author ([antony.chen@unlv.edu](mailto:antony.chen@unlv.edu))

**Table S1.** Information of U.S. EPA NCore sites in this study and the mean concentrations of criteria air pollutants by site during the COVID-19 reference (January 15 – March 7) and first-phase lockdown (March 15 – April 25) period for year 2020. (2017–2019 baseline data not shown)

| Site ID | AQS ID*   | State          | County          | Latitude | Longitude | Zip Code | Pop. Density <sup>†</sup> | Reference Period (P0)              |                       |                                                      |                                                     |                                   | Lockdown Period (P1)               |                       |                                                      |                                                     |                                   |
|---------|-----------|----------------|-----------------|----------|-----------|----------|---------------------------|------------------------------------|-----------------------|------------------------------------------------------|-----------------------------------------------------|-----------------------------------|------------------------------------|-----------------------|------------------------------------------------------|-----------------------------------------------------|-----------------------------------|
|         |           |                |                 |          |           |          |                           | NO <sub>2</sub> <sup>‡</sup> (ppb) | CO <sup>‡</sup> (ppm) | PM <sub>2.5</sub> <sup>‡</sup> (µg m <sup>-3</sup> ) | PM <sub>10</sub> <sup>‡</sup> (µg m <sup>-3</sup> ) | O <sub>3</sub> <sup>‡</sup> (ppb) | NO <sub>2</sub> <sup>‡</sup> (ppb) | CO <sup>‡</sup> (ppm) | PM <sub>2.5</sub> <sup>‡</sup> (µg m <sup>-3</sup> ) | PM <sub>10</sub> <sup>‡</sup> (µg m <sup>-3</sup> ) | O <sub>3</sub> <sup>‡</sup> (ppb) |
| NV1     | 320030540 | Nevada         | Clark           | 36.142   | -115.079  | 89121    | 6969                      | 18.9                               | 0.59                  | 10.3                                                 | 33.9                                                | 23                                | 7.0                                | 0.26                  | 4.6                                                  | 15.6                                                | 39                                |
| UT1     | 490353006 | Utah           | Salt Lake       | 40.736   | -111.872  | 84105    | 7283                      | 22.0                               |                       | 5.5                                                  |                                                     | 24                                | 8.0                                |                       | 3.1                                                  |                                                     | 41                                |
| CA1     | 060190011 | California     | Fresno          | 36.785   | -119.773  | 93726    | 6344                      | 14.7                               | 0.45                  | 15.0                                                 | 34.1                                                | 20                                | 4.9                                | 0.20                  | 5.6                                                  | 12.3                                                | 28                                |
| CA2     | 060850005 | California     | Santa Clara     | 37.348   | -121.895  | 95112    | 7885                      | 14.7                               | 0.41                  | 8.7                                                  |                                                     | 24                                | 6.1                                | 0.22                  | 4.9                                                  |                                                     | 30                                |
| NY1     | 360810124 | New York       | Queens          | 40.736   | -73.822   | 11367    | 17252                     | 18.5                               | 0.29                  | 6.4                                                  |                                                     | 24                                | 8.3                                | 0.15                  | 3.5                                                  |                                                     | 36                                |
| VA1     | 510870014 | Virginia       | Henrico         | 37.557   | -77.400   | 23223    | 2830                      | 7.7                                | 0.26                  |                                                      |                                                     | 27                                | 3.2                                | 0.19                  |                                                      |                                                     | 36                                |
| MA1     | 250250042 | Massachusetts  | Suffolk         | 42.330   | -71.083   | 02119    | 15871                     | 14.3                               | 0.27                  | 5.8                                                  |                                                     | 26                                | 7.3                                | 0.18                  | 3.4                                                  |                                                     | 35                                |
| CA3     | 060658001 | California     | Riverside       | 34.000   | -117.416  | 92509    | 2418                      | 17.5                               | 0.36                  | 10.6                                                 | 40.4                                                | 29                                | 9.3                                | 0.21                  | 6.3                                                  | 21.8                                                | 36                                |
| CA4     | 060670006 | California     | Sacramento      | 38.614   | -121.368  | 95821    | 4691                      | 8.1                                | 0.32                  | 10.1                                                 |                                                     | 27                                | 3.1                                | 0.17                  | 4.2                                                  |                                                     | 34                                |
| NC1     | 371830014 | North Carolina | Wake            | 35.856   | -78.574   | 27616    | 1903                      | 6.0                                | 0.23                  |                                                      | 11.3                                                | 29                                | 2.5                                | 0.20                  |                                                      | 14.5                                                | 36                                |
| IN1     | 180970078 | Indiana        | Marion          | 39.811   | -86.114   | 46218    | 3077                      | 10.1                               | 0.25                  | 10.3                                                 | 16.3                                                | 27                                | 6.7                                | 0.25                  | 11.1                                                 | 19.3                                                | 31                                |
| RI1     | 440071010 | Rhode Island   | Providence      | 41.841   | -71.361   | 02916    | 3185                      | 8.4                                |                       | 6.3                                                  |                                                     | 26                                | 4.4                                |                       | 3.8                                                  |                                                     | 37                                |
| AZ1     | 040139997 | Arizona        | Maricopa        | 33.504   | -112.096  | 85015    | 7709                      | 16.7                               | 0.42                  | 8.3                                                  | 27.7                                                | 24                                | 9.2                                | 0.25                  | 4.8                                                  | 16.8                                                | 34                                |
| MO1     | 295100085 | Missouri       | St. Louis City  | 38.656   | -90.198   | 63107    | 4962                      | 12.6                               | 0.26                  | 8.1                                                  |                                                     | 23                                | 9.2                                | 0.22                  | 7.8                                                  |                                                     | 29                                |
| MD1     | 240330030 | Maryland       | Prince George's | 39.055   | -76.878   | 20705    | 1657                      | 8.3                                |                       | 4.9                                                  |                                                     | 28                                | 4.2                                |                       | 4.1                                                  |                                                     | 37                                |
| OK1     | 401431127 | Oklahoma       | Tulsa           | 36.205   | -95.977   | 74106    | 2330                      | 7.9                                | 0.26                  | 8.7                                                  |                                                     | 28                                | 4.9                                | 0.17                  | 8.8                                                  |                                                     | 32                                |
| OH1     | 390610040 | Ohio           | Hamilton        | 39.129   | -84.504   | 45219    | 9418                      | 9.8                                | 0.21                  | 8.5                                                  | 17.4                                                | 26                                | 6.8                                | 0.20                  | 8.9                                                  | 20.7                                                | 33                                |
| NM1     | 350010023 | New Mexico     | Bernalillo      | 35.134   | -106.585  | 87109    | 3997                      | 11.7                               | 0.22                  | 4.4                                                  | 14.4                                                | 27                                | 5.7                                | 0.17                  | 3.4                                                  | 14.3                                                | 41                                |
| MN1     | 270031002 | Minnesota      | Anoka           | 45.138   | -93.208   | 55449    | 1042                      | 8.2                                |                       | 8.3                                                  | 10.7                                                | 31                                | 4.9                                |                       | 6.2                                                  | 9.5                                                 | 34                                |
| GA1     | 130890002 | Georgia        | DeKalb          | 33.688   | -84.291   | 30034    | 2543                      | 10.7                               | 0.28                  | 7.7                                                  | 11.7                                                | 21                                | 8.1                                | 0.26                  | 8.8                                                  | 15.1                                                | 28                                |
| OR1     | 410510080 | Oregon         | Multnomah       | 45.497   | -122.603  | 97206    | 5509                      | 8.5                                |                       | 6.9                                                  |                                                     | 22                                | 6.0                                |                       | 5.9                                                  |                                                     | 30                                |
| WA1     | 530330080 | Washington     | King            | 47.568   | -122.309  | 98108    | 2989                      | 10.5                               | 0.22                  | 3.4                                                  |                                                     | 23                                | 7.5                                | 0.19                  | 3.9                                                  |                                                     | 30                                |

**Table S1. Continued.**

|     |           |              |           |        |          |       |      |      |      |      |      |    |     |      |      |      |    |
|-----|-----------|--------------|-----------|--------|----------|-------|------|------|------|------|------|----|-----|------|------|------|----|
| OH2 | 390350060 | Ohio         | Cuyahoga  | 41.492 | -81.678  | 44115 | 3730 | 9.0  | 0.22 | 8.7  | 16.2 | 28 | 8.2 | 0.20 | 7.7  | 14.5 | 28 |
| HI1 | 150030010 | Hawaii       | Honolulu  | 21.324 | 47.568   | 96707 | 895  | 4.6  |      | 4.1  | 14.7 |    | 3.1 |      | 3.6  | 11.9 |    |
| KS1 | 202090021 | Kansas       | Wyandotte | 39.117 | -94.636  | 66102 | 2621 | 10.8 |      | 11.3 |      | 24 | 7.5 |      | 11.6 |      | 31 |
| MD2 | 240230002 | Maryland     | Garrett   | 39.706 | -79.012  | 21532 | 201  | 1.8  | 0.13 | 4.1  |      | 36 | 1.6 | 0.12 | 4.3  |      | 39 |
| ND1 | 380150003 | North Dakota | Burleigh  | 46.825 | -100.768 | 58501 | 1157 | 6.6  | 0.19 | 5.1  |      | 26 | 3.7 | 0.16 | 4.8  |      | 31 |
| WY1 | 560210100 | Wyoming      | Laramie   | 41.182 | -104.778 | 82009 | 314  | 3.8  | 0.14 | 1.5  | 5.2  | 33 | 2.6 | 0.15 | 2.2  | 6.2  | 34 |

\*AQS IDs are site codes identifiable by the U.S. EPA Air Quality System (<https://www.epa.gov/aqs>)

†Population density corresponds to each site's zip code is derived from the ZIP Code Database: <https://www.unitedstateszipcodes.org>

\*Mean pollutant concentrations are based on daily values initially reported from the NCore sites, which may be subject to changes before submitted to the U.S. EPA Air Quality System.

**Table S2.** Spearman correlation coefficients among percentage changes ( $\Delta I\%$ ) of criteria air pollutants due to the lockdown. Calculations are based on 28 NCore sites (Table 1) excluding missing data. Numbers in the bracket represent the 95% confidence interval. Significant results are marked in bold.

| Corr. Coef.       | NO <sub>2</sub>          | CO                       | PM <sub>2.5</sub>        | PM <sub>10</sub>   | O <sub>3</sub> |
|-------------------|--------------------------|--------------------------|--------------------------|--------------------|----------------|
| NO <sub>2</sub>   | -                        |                          |                          |                    |                |
| CO                | <b>0.52 (0.10, 0.77)</b> | -                        |                          |                    |                |
| PM <sub>2.5</sub> | <b>0.71 (0.43, 0.85)</b> | <b>0.71 (0.37, 0.88)</b> | -                        |                    |                |
| PM <sub>10</sub>  | 0.38 (-0.23, 0.76)       | <b>0.84 (0.44, 0.95)</b> | <b>0.78 (0.35, 0.93)</b> | -                  |                |
| O <sub>3</sub>    | -0.09 (-0.45, 0.30)      | 0.09 (-0.35, 0.50)       | -0.19 (-0.54, 0.23)      | 0.01 (-0.56, 0.58) | -              |
